# Supplementary material for: Transferability of PCR-based diagnostic protocols: An international collaborative case study assessing protocols targeting the quarantine pine pathogen Fusarium circinatum
Source: PubMed Central journal article supplement (PMC6546748; doi:10.1038/s41598-019-44672-8), 2019-06-03
Supplement: 41598_2019_44672_MOESM1_ESM.pdf [file 41598_2019_44672_MOESM1_ESM.pdf]

## SUPPLEMENTARY INFORMATION

### **Transferability of PCR-based diagnostic protocols: An international collaborative case study assessing protocols targeting the quarantine pine pathogen *Fusarium circinatum***

Renaud Ios<sup>1\*</sup>, Francesco Aloj<sup>2,24</sup>, Barbara Piškur<sup>3</sup>, Cécile Guinet<sup>1</sup>, Martin Mullett<sup>4,22</sup>, Mónica Berbegal<sup>5</sup>, Helena Bragança<sup>6</sup>, Santa Olga Cacciola<sup>2</sup>, Funda Oskay<sup>7</sup>, Carolina Cornejo<sup>8</sup>, Kalev Adamson<sup>9</sup>, Clovis Douanla-Meli<sup>10</sup>, Audrius Kačergius<sup>11</sup>, Pablo Martínez-Álvarez<sup>12</sup>, Justyna Anna Nowakowska<sup>13</sup>, Nicola Luchi<sup>14</sup>, Anna Maria Vettraino<sup>15</sup>, Rodrigo Ahumada<sup>16</sup>, Matias Pasquali<sup>17</sup>, Gerda Fourie<sup>18</sup>, Loukas Kanetis<sup>19</sup>, Artur Alves<sup>20</sup>, Luisa Ghelardini<sup>21</sup>, Miloň Dvořák<sup>22</sup>, Antonio Sanz-Ros<sup>23</sup>, Julio J. Diez<sup>12</sup>, Jeyaseelan Baskarathevan<sup>25</sup>, and Jaime Aguayo<sup>1</sup>.

<sup>1</sup> ANSES Laboratoire de la Santé des Végétaux, Unité de Mycologie, Domaine de Pixérécourt Bât. E, 54220 Malzéville, France.

<sup>2</sup> Department of Agriculture, Food and Environment, University of Catania, Via Santa Sofia, 100, Catania, 95123, Italy

<sup>3</sup> Slovenian Forestry Institute, Department of Forest Protection, Večna pot 2, SI-1000 Ljubljana, Slovenia

<sup>4</sup> Forest Research, Alice Holt Lodge, Farnham, Surrey, GU10 4LH, United Kingdom.

<sup>5</sup> Instituto Agroforestal Mediterráneo, Universitat Politècnica de València, Camino de Vera s/n 46022 Valencia, Spain

<sup>6</sup> Instituto Nacional de Investigação Agrária e Veterinária I.P. (INIAV I.P.), Quinta do Marquês, 2780-159, Oeiras, Portugal

<sup>7</sup> Çankırı Karatekin University, Faculty of Forestry, 18200, Çankırı, Turkey

<sup>8</sup> Swiss Federal Institute for Forest, Snow and Landscape Research WSL, Zuercherstrasse 111, 8903 Birmensdorf, Switzerland

<sup>9</sup> Institute of Forestry and Rural Engineering, Estonian University of Life Sciences, 51006 Tartu, Estonia

<sup>10</sup> Julius Kühn-Institut, Institute for National and International Plant Health, Messeweg 11-12, 38104 Braunschweig, Germany

<sup>11</sup> Lithuanian Research Centre for Agriculture and Forestry, Vokė Branch, Zalioji Sq. 2, 02232 Vilnius, Lithuania

<sup>12</sup> Sustainable Forest Management Research Institute, University of Valladolid – INIA / Department of Vegetal Production and Forest Resources, University of Valladolid, 47011 Palencia, Spain

<sup>13</sup> Cardinal Stefan Wyszyński University in Warsaw, Faculty of Biology and Environmental Sciences, Wóycickiego 1/3 Street, 01-938 Warsaw, Poland

<sup>14</sup> Institute for Sustainable Plant Protection - National Research Council (IPSP-CNR), Via Madonna del Piano 10, I-50019, Sesto Fiorentino, Florence, Italy.

<sup>15</sup> Department for Innovation in Biological, Agro-food and Forest Systems (DIBAF), University of Tuscia, via S. Camillo de Lellis, snc, 01100 Viterbo, Italy

<sup>16</sup> Bioforest S.A. Camino a Coronel km 15 S/N. 4030000 Concepción, Chile.

<sup>17</sup> Department of Food, Environmental and Nutritional Sciences, University of Milan, via Celoria 2, I-20133, Milano, Italy

<sup>18</sup> Department of Biochemistry, Genetics and Microbiology, Forestry and Agricultural Biotechnology Institute (FABI), University of Pretoria, 0028 Hatfield, Pretoria, South Africa

<sup>19</sup> Department of Agricultural Sciences, Biotechnology, and Food Science, Cyprus University of Technology, 3036 Limassol, Cyprus

<sup>20</sup> Departamento de Biologia, CESAM, Universidade de Aveiro, 3810-193 Aveiro, Portugal

<sup>21</sup> Dipartimento di Scienze delle Produzioni Agroalimentari e dell'Ambiente (DISPAA), University of Florence, 50144 Florence, Italy

<sup>22</sup> Phytophthora Research Center, Department of Forest Protection and Wildlife Management, Faculty of Forestry and Wood Technology, Mendel University in Brno, Zemědělská 3, 613 00 Brno, Czech Republic

<sup>23</sup> Forest Health Center of Calabazanos. Regional Government of Castilla y León, JCyL. Poligono Industrial de Villamuriel, S/N, 30190. Villamuriel de Cerrato, Palencia, Spain

<sup>24</sup> Dipartimento di Scienze Agrarie, Alimentari e Forestali, Università degli Studi di Palermo, Viale delle Scienze, 90128 Palermo, Italy

<sup>25</sup> Plant Health & Environment Laboratory, Diagnostic and Surveillance Services, Biosecurity New Zealand, Ministry for Primary Industries, PO Box 2095, Auckland 1140, New Zealand

\* Correspondance to [renaud.ioos@anses.fr](mailto:renaud.ioos@anses.fr)

## Supplementary information 1

### Protocol 8: Real-time PCR assay parameters and conditions targeting *Fusarium circinatum*

**Primers and probe:** The primers and probe were designed based on *F. circinatum* SCAR marker sequence (Baskarathevan et al. unpublished)

FC-2F (Forward primer) : 5'-GGATCACATGTAACATAATGTG-3'

FC-3R (Reverse primer) : 5'-TAAGCTCAGACTATCACCT-3'

FC-3P (Probe) : 5'-**FAM**-CGGGATTCTCCCCGATGGTGTTC**A-BHQ1**-3'

#### PCR reaction (20 µL Volume):

| Reagents            | Volume per reaction (µL) |
|---------------------|--------------------------|
| Sterile water       | 5.0                      |
| Reaction Mix (x2)   | 10.0                     |
| 5 µM FC-2F (300 nM) | 1.2                      |
| 5 µM FC-3R (300 nM) | 1.2                      |
| 5 µM FC-3P (150 nM) | 0.6                      |
| DNA template        | 2.0                      |
| Total Volume        | 20.0                     |

*Note: This assay has been tested with PerfeCTa™ qPCR ToughMix™ (Quanta Biosciences) and LightCycler 480 Probes Master (Roche). Any alternative qPCR master mix can be used. However, the test should be validated with relevant positive controls.*

### PCR cycling conditions

| Step                    | Time   | Temp | Cycles        |
|-------------------------|--------|------|---------------|
| Initial denaturation    | 5 min  | 95°C | Hold          |
| Denaturation            | 15 sec | 95°C | } x 40 cycles |
| Annealing and Extension | 40 sec | 62°C |               |

### Result

A Cq value of <36 is considered as positive detection of *F. circinatum*.

## Supplementary information 2

Recommended amplification conditions of each protocol for the detection of *F. circinatum* according to the original publication

| Protocol <sup>a</sup>    | Forward/<br>reverse primers                          | Probe            | Recommended<br>DNA Polymerase<br>/ master mix <sup>b</sup> | Final concentrations  |               |                           | Amplification parameters [T(°C)/time(S)] |                  |               |               |                     | Nb<br>Cycles |
|--------------------------|------------------------------------------------------|------------------|------------------------------------------------------------|-----------------------|---------------|---------------------------|------------------------------------------|------------------|---------------|---------------|---------------------|--------------|
|                          |                                                      |                  |                                                            | Primers<br>( $\mu$ M) | Probe<br>(nM) | MgCl <sub>2</sub><br>(mM) | ID <sup>c</sup>                          | denaturati<br>on | Anneali<br>ng | Extensi<br>on | Final<br>elongation |              |
| <b>p1</b> <sup>23</sup>  | 10Fcirc-F /<br>10Fcirc-R<br>30Fcirc-F /<br>30Fcirc-R | n.a.             | Taq DNA<br>Polymerase<br>(Roche Applied<br>Science)        | 0.5                   | n.a.          | 1.5                       | 94/120                                   | 94/30            | 60/30         | 72/60         | 72/420              | 30           |
| <b>p2</b> <sup>24</sup>  | FCIR-F /<br>FCIR-R                                   | FCIR-P           | qPCR core kit no<br>rox (Eurogentec)                       | 0.3                   | 0.1           | 5                         | 95/600                                   | 95/15            | 70/55         |               | n.a.                | 40           |
| <b>p3</b> <sup>27</sup>  | Fcircinatum_F315 /<br>Fcircinatum_R775               | Fcircinatum_T717 | Quantitect<br>Multiplex NoRox                              | 0.6                   | 0.1           | Unkn.                     | 95/900                                   | 95/15            | 60/90         |               | n.a.                | 50           |
| <b>p4</b> <sup>22</sup>  | CIRC1A /<br>CIRC4A                                   | n.a.             | Platinum Taq<br>Polymerase<br>(Invitrogen) +<br>SYBR Green | 0.5                   | n.a.          | 5                         | 94/180                                   | 94/35            | 66/55         | 72/50         | 72/720 <sup>e</sup> | 45           |
| <b>p5</b> <sup>26</sup>  | CIRC1A /<br>CIRC4A                                   | n.a.             | SoFast EvaGreen<br>Supermix                                | 0.1                   | n.a.          | Unkn.                     | -                                        | 95/10            | 65/15         | 72/30         | - <sup>e</sup>      | 44           |
| <b>p6</b> <sup>25</sup>  | CIRC1L /<br>CIRC4L                                   | n.a.             | Platinum Taq<br>Polymerase<br>(Invitrogen) +<br>SYBR Green | 0.4                   |               | Unkn.                     | 95/180                                   | 95/35            | 66/55         | 72/50         | - <sup>e</sup>      | 45           |
| <b>p7</b> <sup>28</sup>  | Fcrc-F<br>Fcrc-R                                     | Fcrc-P           | TaqMan Universal<br>Master mix (Appl.<br>Biosystems)       | 0.3                   | 0.2           | Unkn.                     | 94/600                                   | 95/30            | 60/60         | -             | -                   | 50           |
| <b>p8</b> <sup>5F1</sup> | FC-2F /<br>FC-3R                                     | FC-3P            | Perfecta qPCR<br>ToughMix, quanta<br>biosciences           | 0.3                   | 0.15          | Unkn.                     | 95/300                                   | 95/15            | 62/40         | -             | -                   | 40           |
| <b>p9</b> <sup>13</sup>  | CIRC1A /<br>CIRC4A                                   | -                | Not specified <sup>d</sup>                                 | 0.5                   | -             | 2 mM                      | 94/180                                   | 94/35            | 66/55         | 72/50         | 72/720              | 45           |

<sup>a</sup> Reference

<sup>d</sup> Brand / type recommended in the original paper but study participants were free to use others

<sup>c</sup> Initial denaturation

<sup>d</sup> Not specified in EPPO (2009), but the original work of Schweigkofler *et al.* (2004) reports the use of Platinum Taq Polymerase (Invitrogen)

<sup>e</sup> Melt curve analysis required

## Supplementary Information 3

Thermal cycler model and reagent details used by each of the participating laboratories

| Laboratory  | Reagent PCR                                                                   | Reagent Sybr-Green PCR                                     | Reagent hydrolysis probe PCR                              | PCR equipment                              | Real-time PCR equipment                        |
|-------------|-------------------------------------------------------------------------------|------------------------------------------------------------|-----------------------------------------------------------|--------------------------------------------|------------------------------------------------|
| <b>Lab1</b> | n.a.                                                                          | KAPA BIOSYSTEMS SYBR FAST Universal qPCR kit (Roche)       | n.a.                                                      | n.a.                                       | QuantStudio 6 Flex System (Applied Biosystems) |
| <b>Lab2</b> | 5x HOT FIREPol Blend Master Mix with 7,5 mM MgCl <sub>2</sub> (Solis BioDyne) | 5x HOT FIREPol Probe qPCR Mix Plus, no rox (Solis BioDyne) | 5x HOT FIREPol Probe qPCR Mix Plus, no rox(Solis BioDyne) | T Professional (Biometra)                  | Rotor-Gene Q (Qiagen)                          |
| <b>Lab3</b> | Taq DNA Polymerase (Qiagen)                                                   | n.a.                                                       | qPCR Core Kit No ROX (Eurogentec)                         | T Professional (Biometra)                  | StepOnePlus (Applied Biosystems)               |
| <b>Lab4</b> | KAPATaq Ready Mix (Roche)                                                     | n.a.                                                       | n.a.                                                      | Techne Prime Thermal Cycler (Cole-Parmer)  | n.a.                                           |
| <b>Lab5</b> | Taqmix BioMIX (Biolin)                                                        | n.a.                                                       | n.a.                                                      | MJ Mini thermal cycler (MJ Research)       | n.a.                                           |
| <b>Lab6</b> | HotBegan Taq DNA polymerase (Canvax Biotech SL)                               | Sybr Premix Ex Taq (Takara)                                | Premix Ex Taq -Probe qPCR (Takara)                        | Verity Thermal Cycler (Applied Biosystems) | Rotor-Gene Q (Qiagen)                          |
| <b>Lab7</b> | HGS Diamond Taq (Eurogentec)                                                  | Mesa green master mix (Eurogentec)                         | Core kit no ROX (Eurogentec)                              | GeneAmp 9700 (Applied Biosystems)          | Rotor-Gene Q (Qiagen)                          |



| Laboratory | Reagent PCR                             | Reagent Sybr-Green PCR                               | Reagent hydrolysis probe PCR                                  | PCR equipment         | Real-time PCR equipment                                |
|------------|-----------------------------------------|------------------------------------------------------|---------------------------------------------------------------|-----------------------|--------------------------------------------------------|
| Lab8       | n.a.                                    | n.a.                                                 | Lumino Ct qPCR Ready Mix (Sigma-Aldrich)                      | n.a.                  | 7500 Real Time PCR System (Applied Biosciences)        |
| Lab9       | n.a.                                    | n.a.                                                 | TaqMan Universal PCR Master Mix (Applied Biosystems)          | n.a.                  | ABI 7500 Fast Realtime (Applied Biosystems)            |
| Lab10      | Platinum qPCR SuperMix-UDG (Invitrogen) | Platinum SYBRGreen qPCR supermix (Invitrogen)        | Maxima Probe/ROX qPCR Master Mix 2X (ThermoFisher Scientific) | Rotor-Gene Q (Qiagen) | Rotor-Gene Q (Qiagen)                                  |
| Lab11      | n.a.                                    | POWER SYBR GREEN PCR MASTER MIX (Applied Biosystems) | Taq-Man Universal MasterMix (Applied Biosystem)               | n.a.                  | StepOne Plus Real-Time PCR System (Applied Biosystems) |
| Lab12      | n.a.                                    | Lightcycler 480 SYBR Green I Master (Roche)          | Lightcycler 480 Probes Master (Roche)                         | n.a.                  | Lightcycler 480 II (Roche)                             |
| Lab13      | n.a.                                    | Evagreen qPCR Master Mix (Biotium)                   | n.a.                                                          | n.a.                  | Step one plus (Applied Biosystems)                     |
| Lab14      | n.a.                                    | Power sybr green mastermix (Applied Biosystem)       | n.a.                                                          | n.a.                  | Quantstudio 3 (Thermo)                                 |

| Laboratory | Reagent PCR                                                 | Reagent Sybr-Green PCR       | Reagent hydrolysis probe PCR                     | PCR equipment                                 | Real-time PCR equipment                 |
|------------|-------------------------------------------------------------|------------------------------|--------------------------------------------------|-----------------------------------------------|-----------------------------------------|
| Lab15      | Taq DNA Polymerase (Roche)                                  | SenseFast SYBR mix (Bioline) | n.a.                                             | Mastercycler nexus gradient (Eppendorf)       | CFX96 (Bio-Rad)                         |
| Lab16      | n.a.                                                        | KAPA SYBR qPCR Kit (Roche)   | KAPA PROBE FAST qPCT Kit (Roche)                 | n.a.                                          | iQ5 (Bio-rad)                           |
| Lab17      | n.a.                                                        | n.a.                         | PerfeCTa qPCR ToughMix (Quanta Biosciences)      | n.a.                                          | Bio-Rad, CFX96 Touch™ (Bio-Rad)         |
| Lab18      | n.a.                                                        | n.a.                         | QuantiNova Probe PCR Master Mix (Qiagen)         | n.a.                                          | CFX96 (Bio-Rad)                         |
| Lab19      | n.a.                                                        | n.a.                         | Perfecta QPCR Toughmix, ROX (Quanta Biosciences) | n.a.                                          | QuantStudio 6 Flex (Applied Biosystems) |
| Lab20      | TrueStart Hot Start Taq DNA Polymerase ( Thermo Scientific) | n.a.                         | n.a.                                             | Mastercycler Nexus GSX1 (Eppendorf)           | n.a.                                    |
| Lab21      | VWR Taq DNA Polymerase (VWR)                                | n.a.                         | n.a.                                             | Hybaid PX2 thermal cycler (Thermo Scientific) | n.a.                                    |

| Laboratory | Reagent PCR                                                                 | Reagent Sybr-Green PCR | Reagent hydrolysis probe PCR                     | PCR equipment     | Real-time PCR equipment |
|------------|-----------------------------------------------------------------------------|------------------------|--------------------------------------------------|-------------------|-------------------------|
| Lab22      | Taq DNA Polymerase with Standard Taq (Mg-free) Buffer (New England Biolabs) | n.a.                   | n.a.                                             | Mj Mini (Bio-rad) | n.a.                    |
| Lab23      | n.a.                                                                        | n.a.                   | TaqMan universal Master Mix (Applied Biosystems) | n.a.              | iCycler iQ (Bio-rad)    |

n.a: not applicable
